# Supplementary material
Source: publisher figshare collection journal article supplement (https://diabetesjournals.figshare.com/ndownloader/files/22108452)
Supplement: Supplementary file 1 [file 22108452]

Supplementary Data

*TWIST1*-reprogrammed endothelial cell transplantation potentiates neovascularization-mediated diabetic wound tissue regeneration

Komal Kaushik1,2 and Amitava Das1,2*

1Department of Applied Biology, CSIR-Indian Institute of Chemical Technology, Uppal Road, Tarnaka, Hyderabad – 500 007 TS, INDIA

2Academy of Scientific and Innovative Research (AcSIR), CSIR-IICT Campus, Hyderabad – 500 007, TS, INDIA

*Corresponding Author: **Dr. Amitava Das,** *Ph.D.* Department of Applied Biology, CSIR-Indian Institute of Chemical Technology, Hyderabad – 500 007, TS, INDIA. E-mail: [*amitavadas@iict.res.in*](mailto:amitavadas@iict.res.in)*;* [*amitavadas.iict@gov.in*](mailto:amitavadas.iict@gov.in)

Supplementary Figures


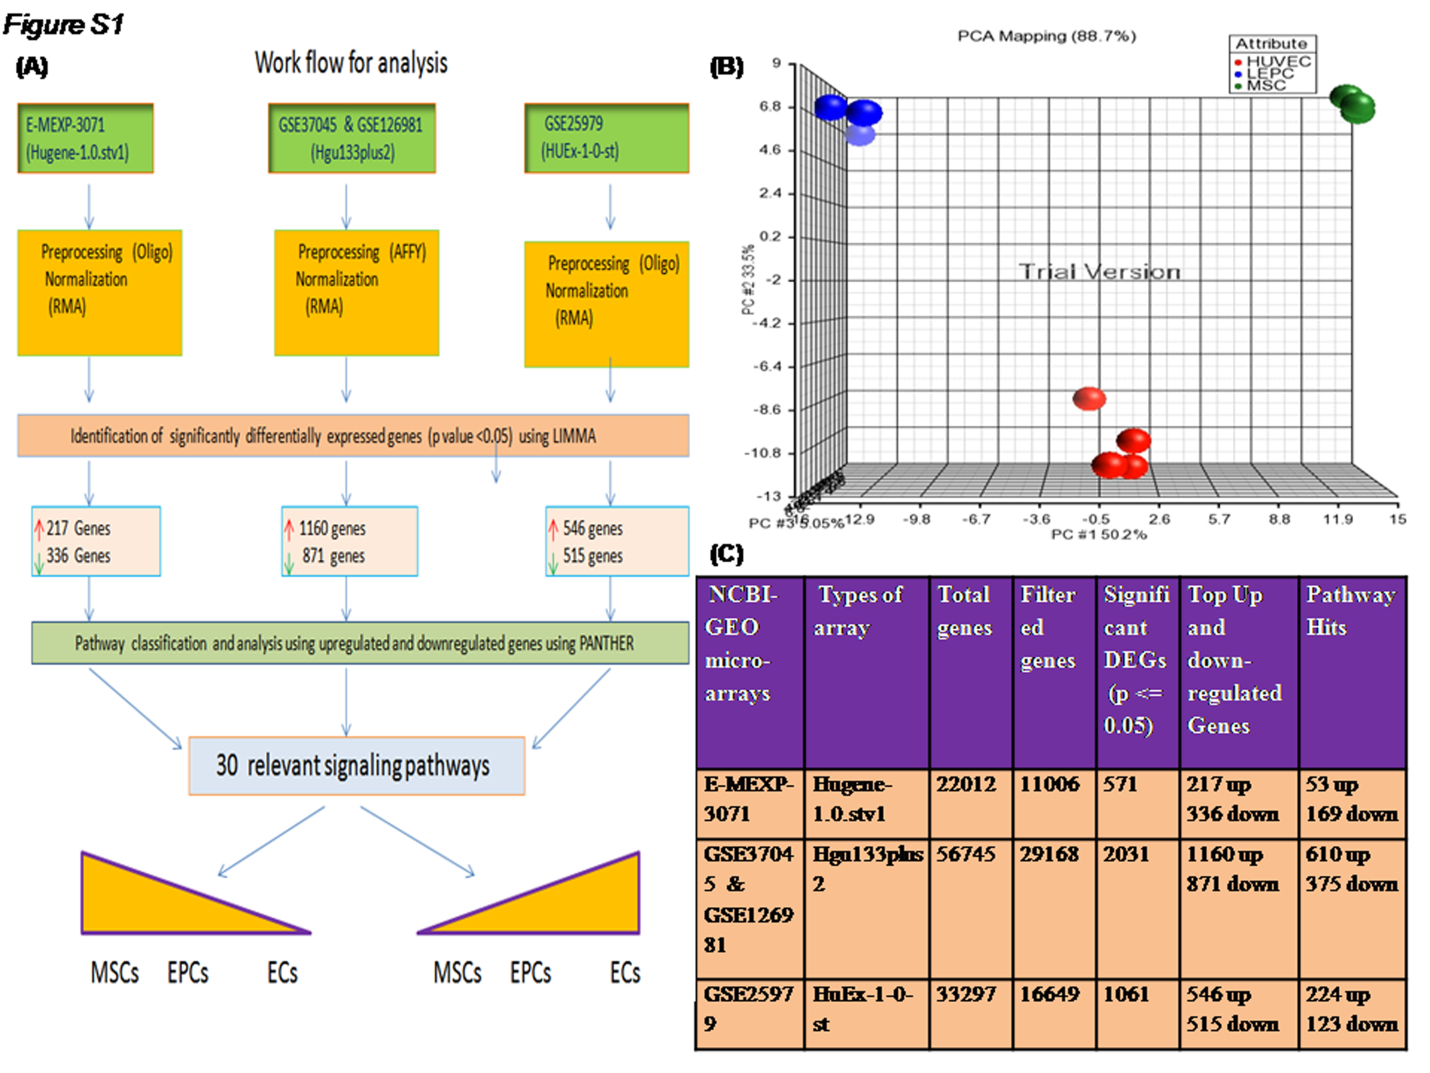


Figure S1. *A meta-analysis of microarray datasets.* (A) Schematic representation of the workflow for the analysis of microarray datasets of MSC, EPC, and HUVEC. (B) Principal component analysis of microarray datasets depicting a significant differential expression profile among different cell types and datasets from the same cell types were grouped together. (C) Detailed tabulated summary of microarray datasets analysis and number of differentially expressed genes (DEGs) obtained along with their associated number of pathway hits using PANTHER.


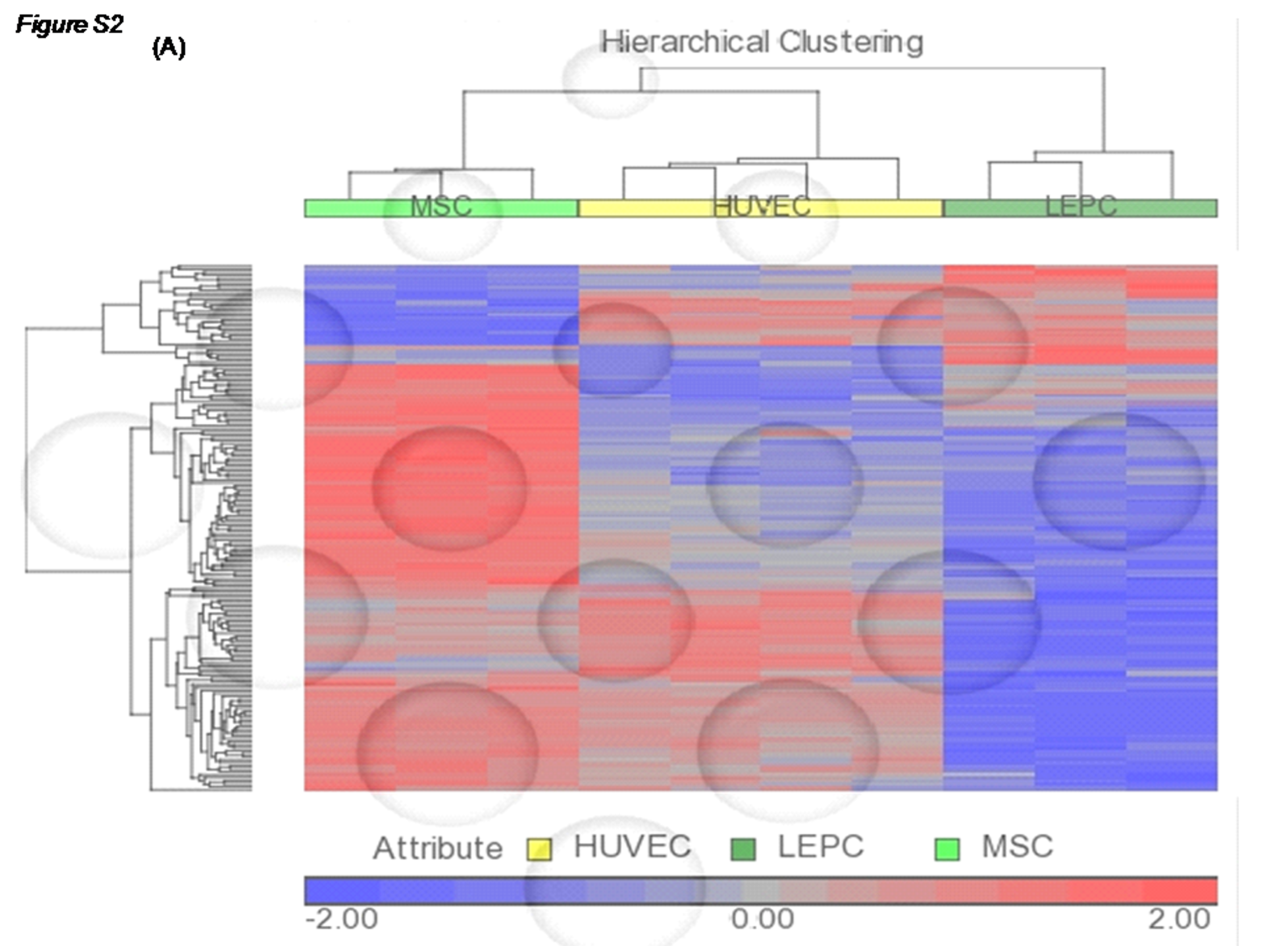


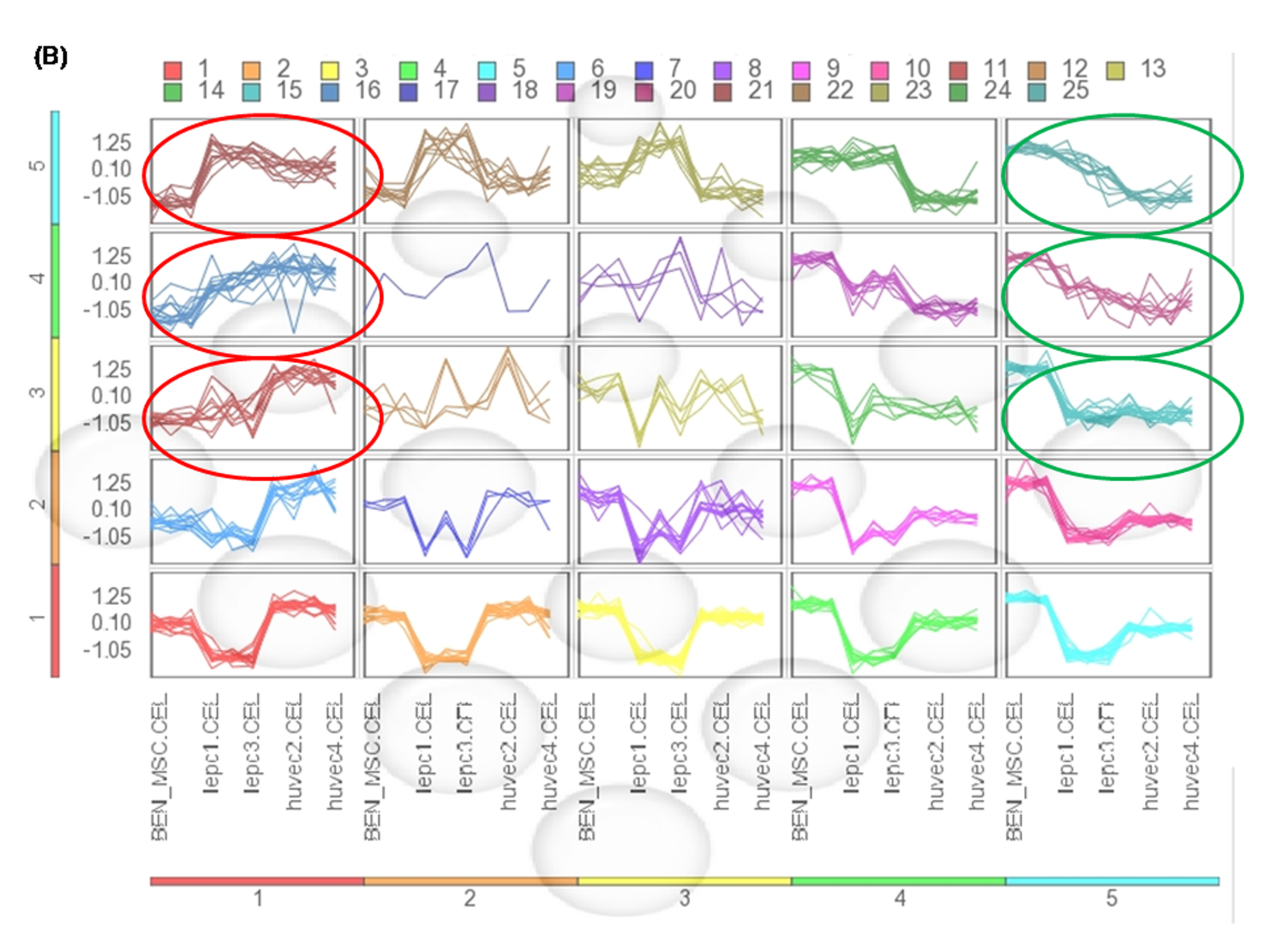


Figure S2. *Profile of gene clusters with consistent increase or decrease mRNA expression levels.* (A) Heatmap representing the differentially expressed genes identified based on their involvement in signaling pathways related to vascularization. (B) Self-organizing Map clustering showing the differential expression pattern of genes selected: Cluster 11, 16 and 21 depicted a consistent increase in genes expression from MSC, LEPC to HUVEC whereas Cluster 15, 20 and 25 depicted decrease in expression from MSC into mature endothelial cells.


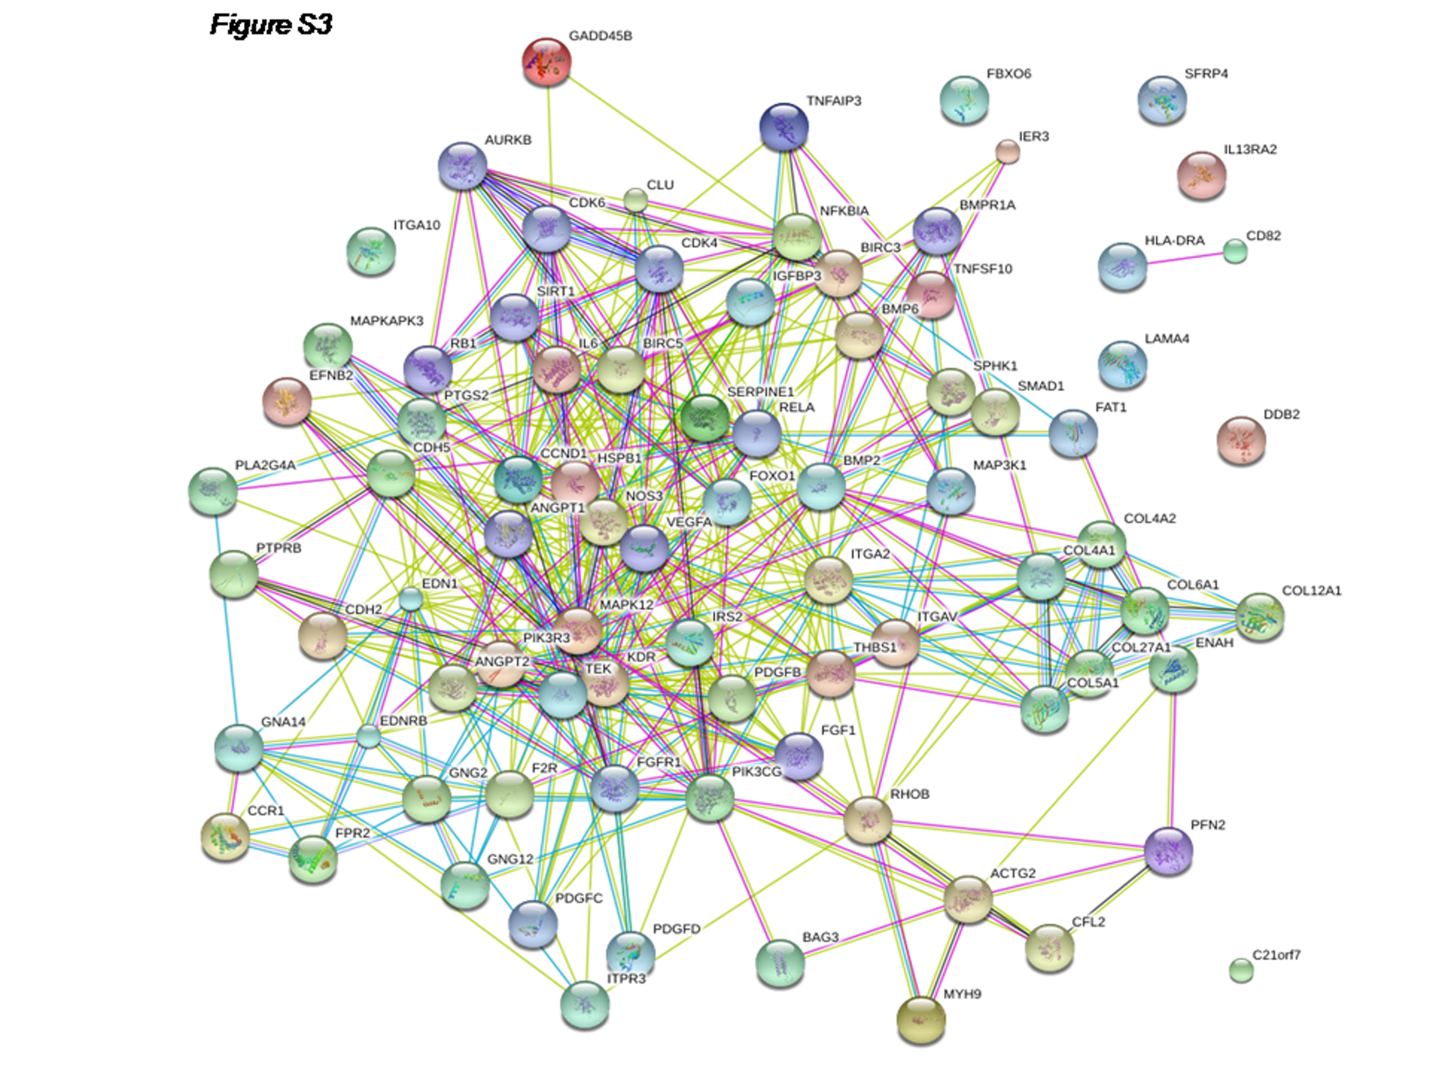


Figure S3. *Gene interaction analysis.* Interaction network summary of predicted associations for 72 up-regulated and down-regulated genes where network nodes are different proteins using string analysis.


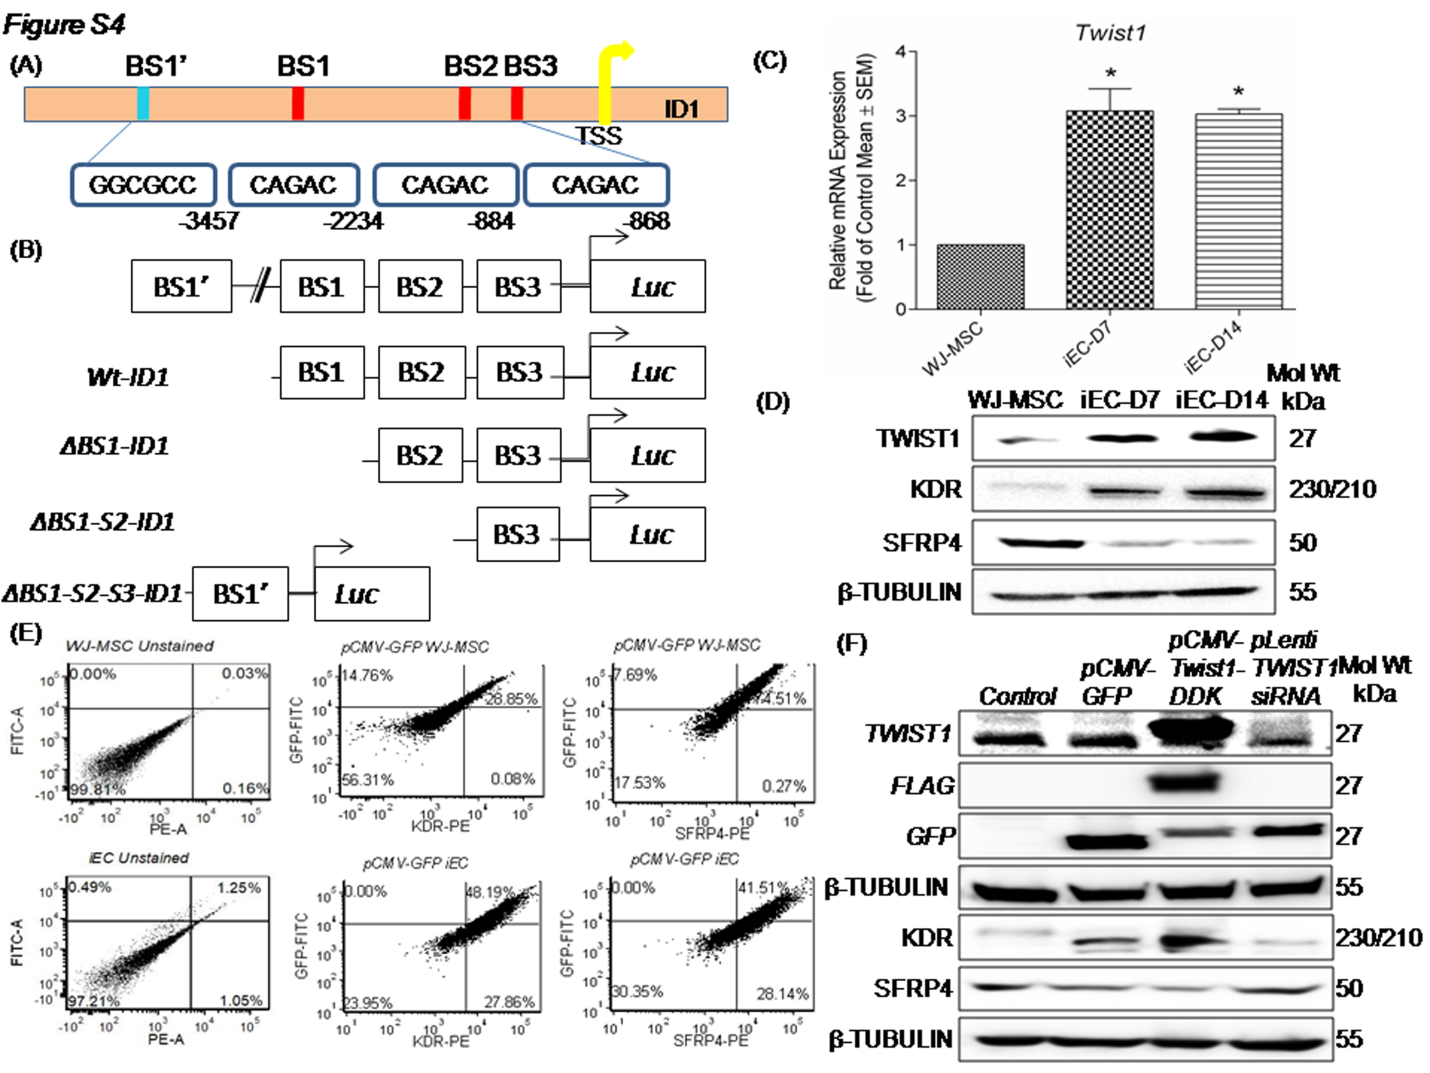


Figure S4. *ID1 promoter schematic and transient overexpression and silencing of TWIST1.* (A) Schematic representation of the *ID1* promoter region depicting putative binding sites of SMAD1/5/8 complex (CAGAC) upstream to transcription start site. (B) Strategy for generation of plasmid constructs cloned with different Smad-binding sites on the *ID1* promoter region in *pMCS-Green Renilla* plasmid. (C) Increased expression of *TWIST1* at mRNA level in iEC as compared to WJ-MSC during transdifferentiation (D) KDR, SFRP4 and TWIST1 at protein level depicting a differential expression during MSC transdifferentiation into iEC. (E) Representative images of flow cytometry analysis depicting a higher percent of iECs expressing KDR while WJ-MSCs expressing SFRP4. (F) Western blot analysis for confirmation of TWIST1 over-expression system with Flag tag and TWIST1 silencing system with GFP expression along with basal expression of TWIST1 in transfected MSCs. Overexpression of *TWIST1* led to an increased KDR and decreased SFRP4 protein expression while TWIST1 silencing reversed this effect.


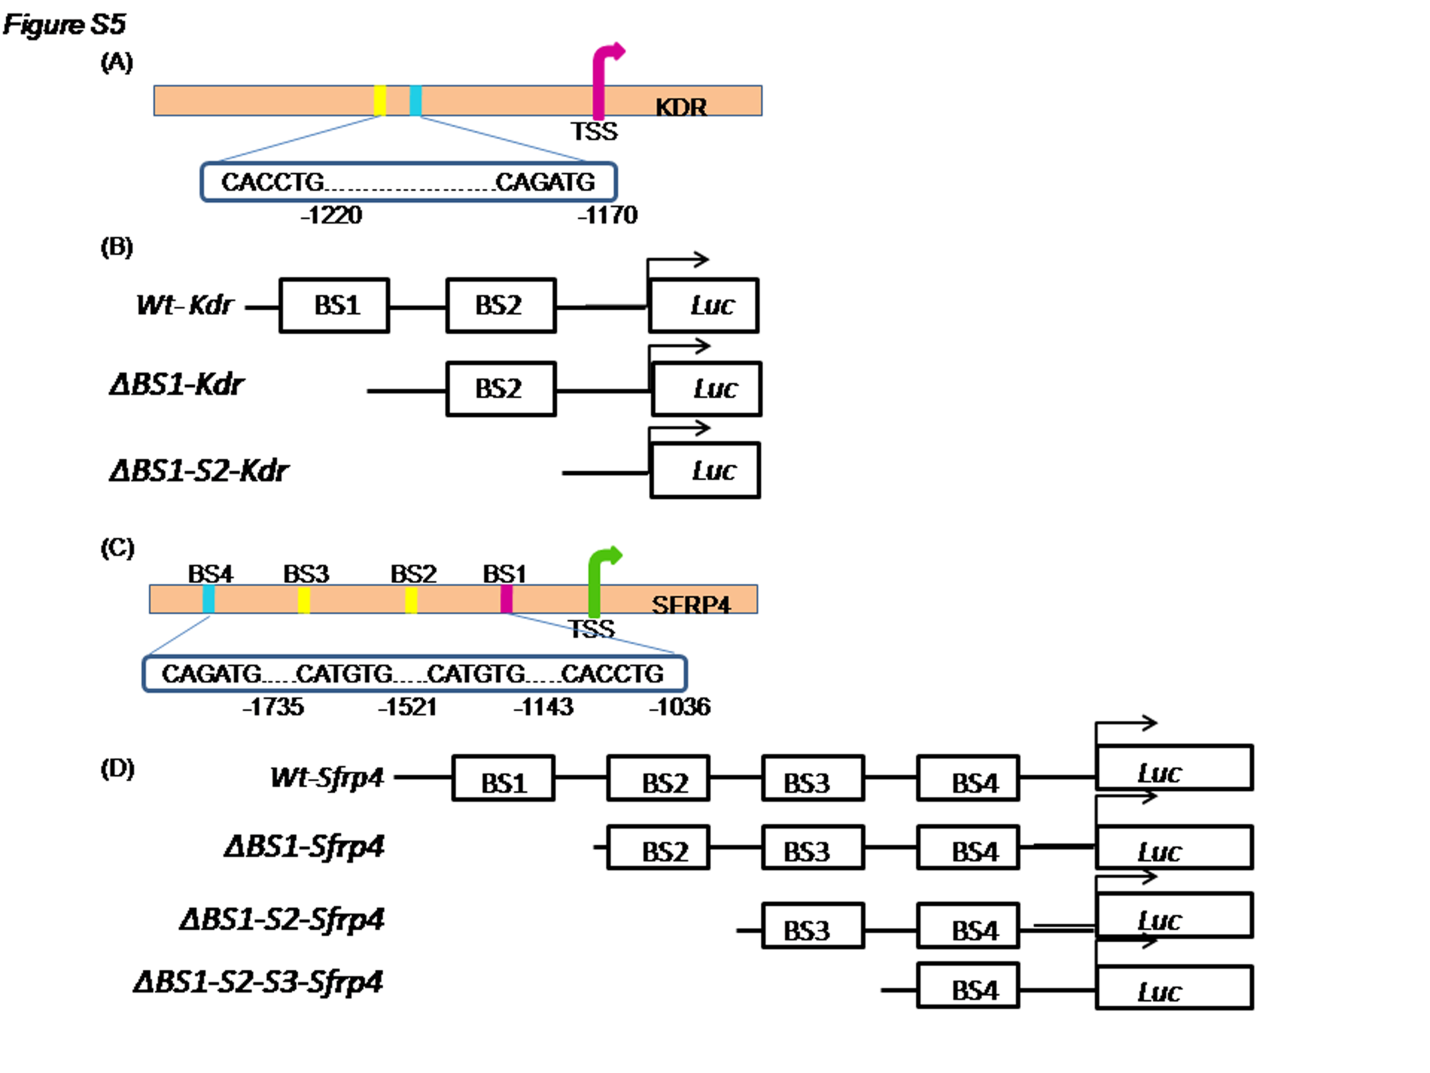


Figure S5. *Putative binding sites of TWIST1 on KDR and SFRP4 promoter*. Schematic representation of two and four putative TWIST1 binding sequences on the (A) *KDR* and (C) *SFRP4* promoter, respectively within 5 Kb upstream of transcription start site; Delineated strategy for deletion constructs of TWIST1 binding region on (B) *KDR* and (D) *SFRP4* promoter by sequential deletion of each site.

*
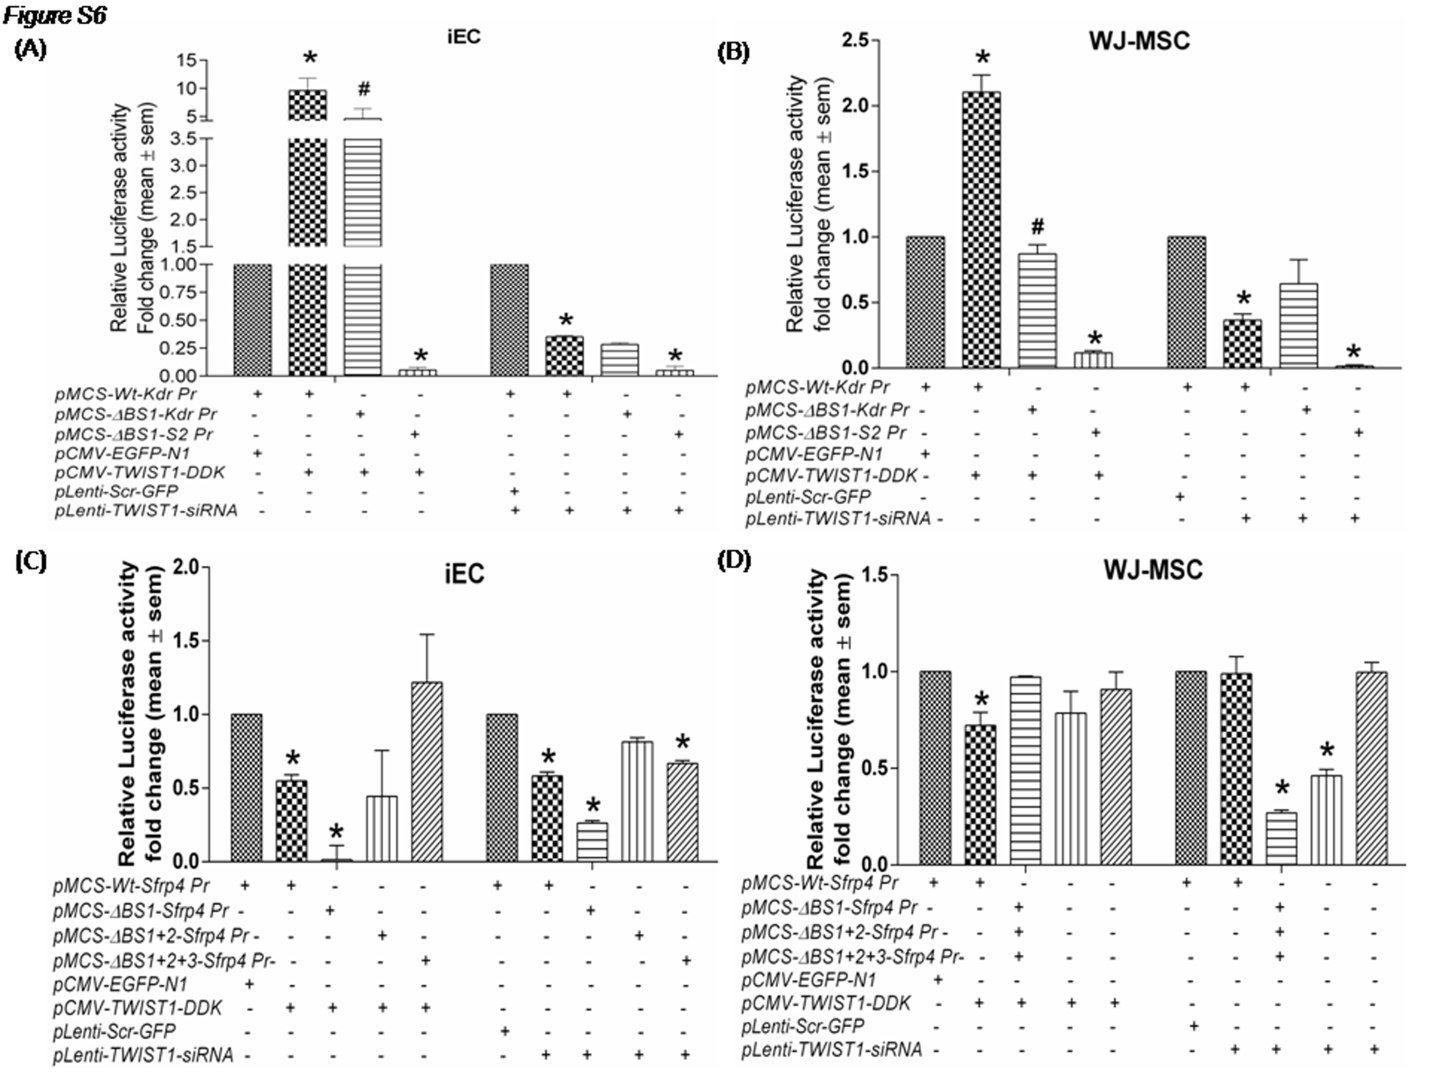
*

*Figure S6. TWIST1 transcriptionally regulates KDR and SFRP4 promoter activity*. Promoter reporter luciferase assay depicting enhanced *KDR* promoter activity in (A) iEC (B) WJ-MSC transfected with *Wt-Kdr* and *TWIST1* overexpression which was mitigated in presence of *TWIST1* silencing. Sequential deletion of BS1 significantly decreased the promoter activity in iECs and WJ-MSCs, but with more prominently in the latter thereby suggesting a cell type-based differential regulation of *KDR* promoter activity via BS1 and BS2 binding sites. Similarly, promoter-reporter luciferase assay depicting decreased *SFRP4* promoter activity in (C) iEC and (D) WJ-MSC transfected with *Wt-Sfrp4* in presence of Twist1 overexpression. Sequential deletion of BS1 and BS2 further decreased the promoter activity whereas *TWIST1* silencing did not revert the effect suggesting the role of other cofactors associated with *SFRP4* transcriptional regulation along with TWIST1. p≤0.05, as compared to **Wt-KdrPr*, #*Wt-Kdr Pr+Twist1-DDK*.

*
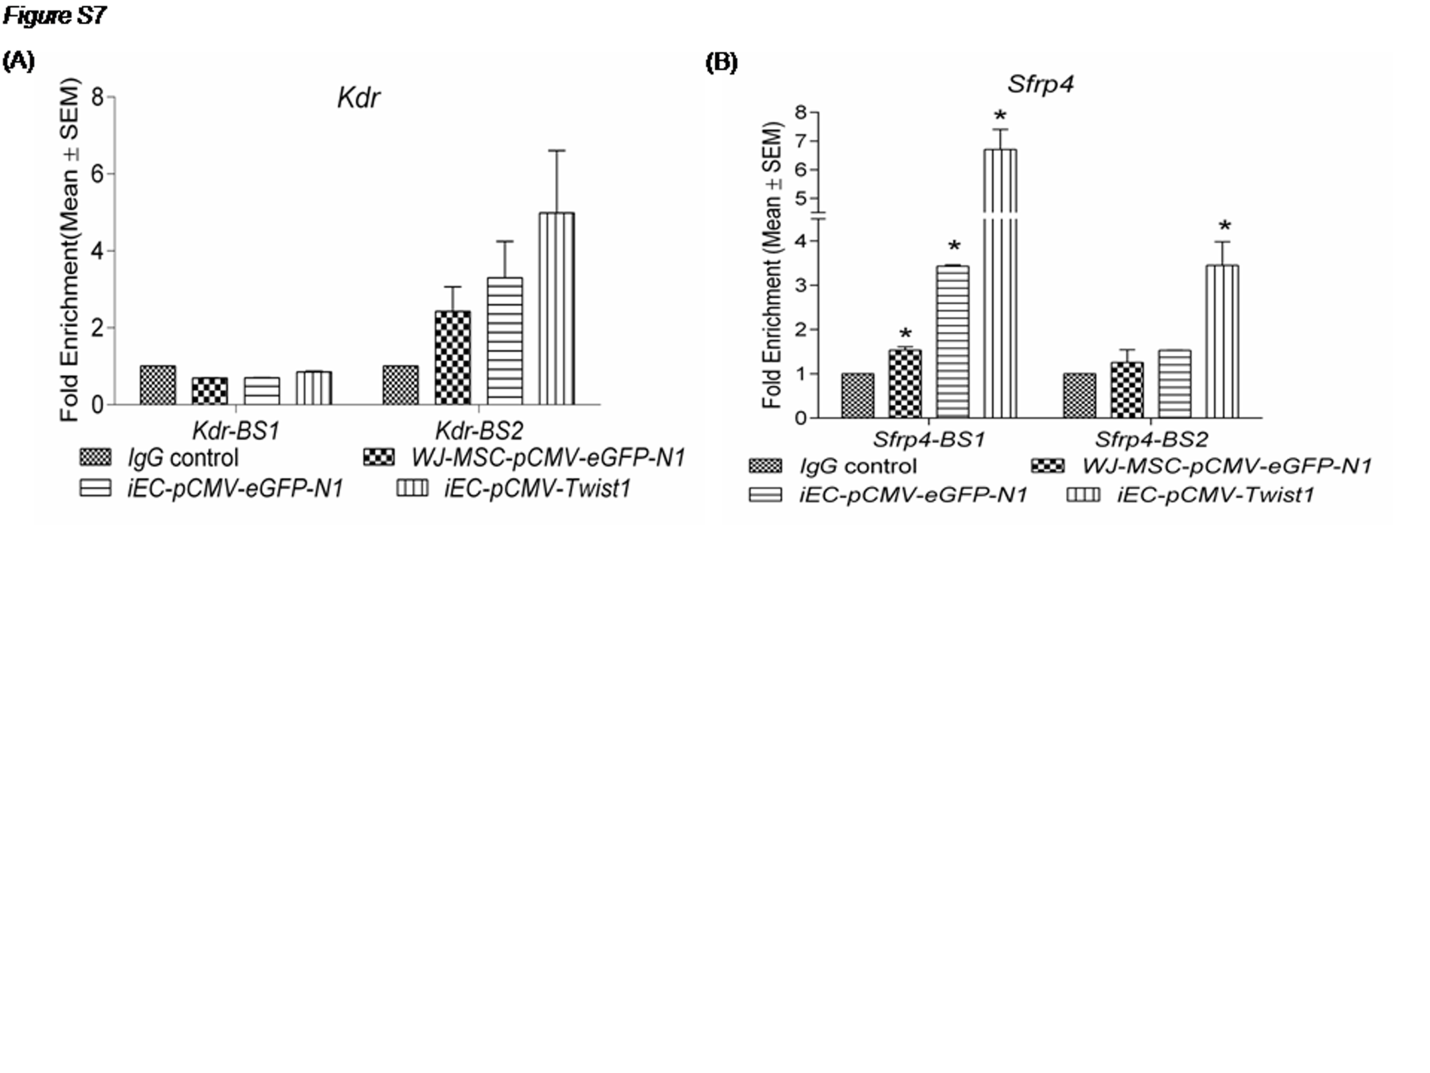
*

*Figure S7. TWIST1 binding on KDR and SFRP4 promoter.* ChIP analysis depicting TWIST1 direct and efficient binding on (A) BS2 of *KDR* and (B) BS1 and BS2 of *SFRP4* promoter which was further increased in the presence of *TWIST1* overexpression. p≤0.05, as compared to **IgG Control*.


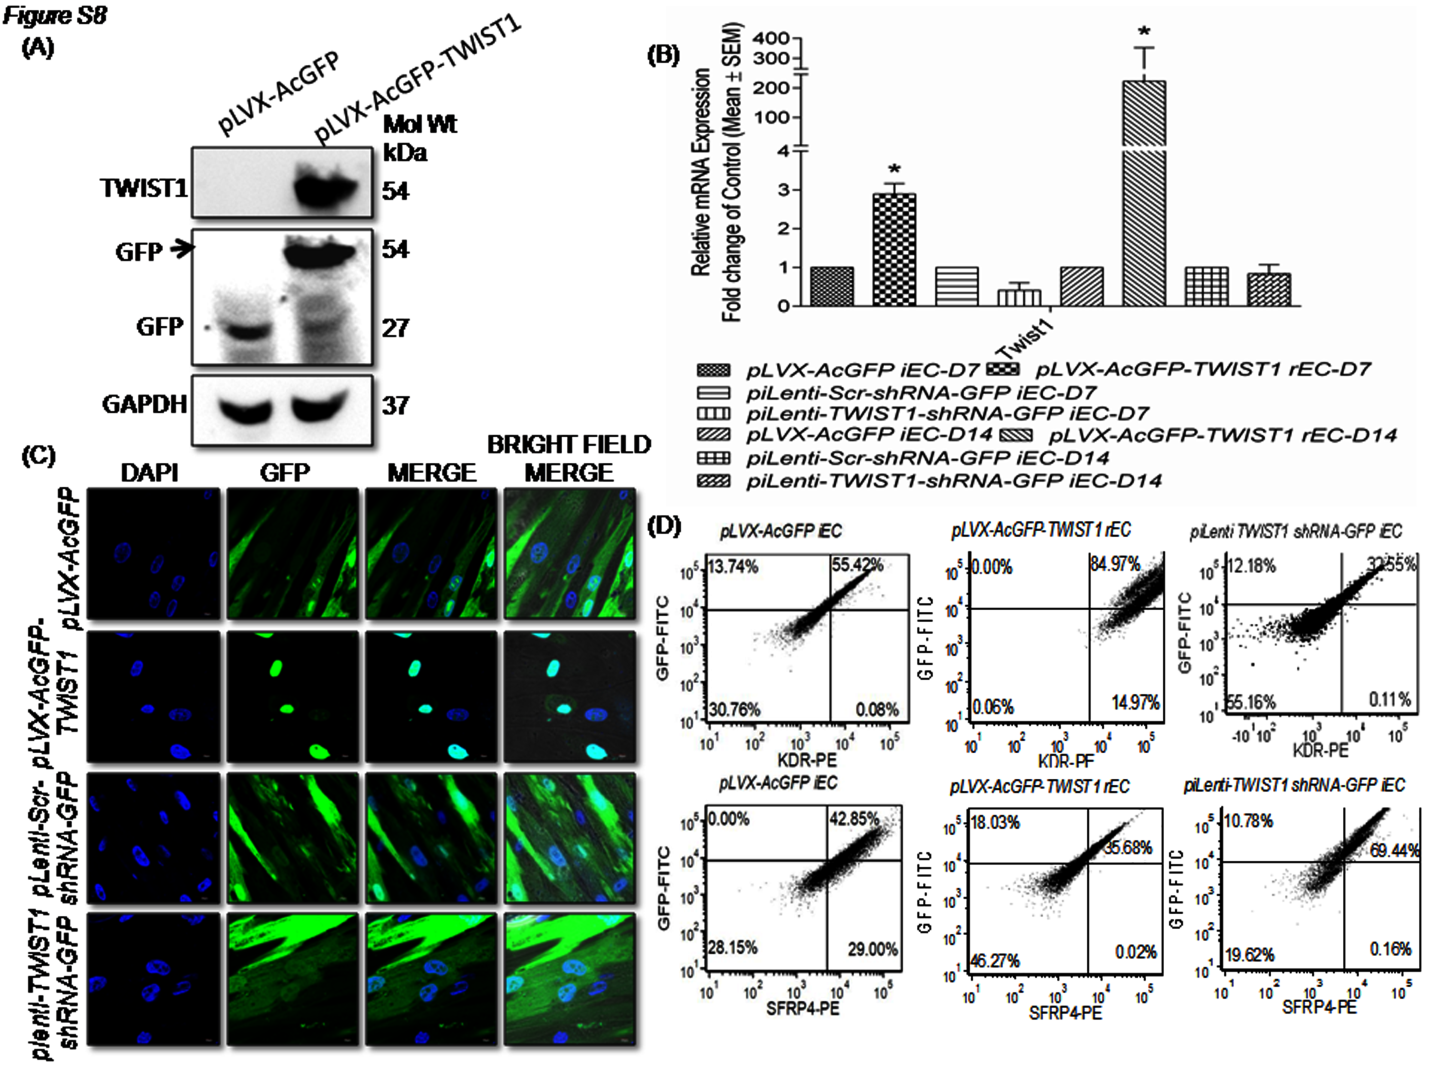


Figure S8. *Stable Twist1 reprogrammed EC (rEC) generation*. (A) Twist1 overexpression was confirmed by immunoblot analysis depicting a shift in the fused TWIST1 protein along with GFP (54 kDa) as compared with GFP (27 kDa) in vector control. (B) qPCR analysis of *TWIST1* at mRNA level further revealed the efficacy of *TWIST1* overexpression as well as silencing system in rEC at day 7 and 14. *p≤0.05, as compared with *pLVX-AcGFP iEC-D7/D14.* (C) Representative fluorescence images of GFP expressing EC transduced with *pLVX-AcGFP iEC* (vector control), *pLVX-AcGFP-TWIST1 rEC*, *piLenti-Scr-shRNA-GFP* *iEC* and/or *piLenti-Twist1-shRNA-GFP iEC* (negative control). (D) Representative images of the flow cytometry analysis depicted an increased and decreased expression of KDR and SFRP4, respectively in TWIST1 rECs which was reverted back in *Twist1-shRNA iECs,* negative control group.

*Figure S9. Twist1 overexpression potentiates WJ-MSC transdifferentiation towards endothelial lineage.* (A) Representative confocal images of DiI Ac-LDL staining in WJ-MSC and trans-differentiated rEC at day 14 depicting enhanced uptake in *pLVX-AcGFP-TWIST1* (rEC) transfected group as compared with *pLVX-AcGFP* iEC (vector control) group. This effect was suppressed in *piLenti-TWIST1-shRNA* iEC (negative control) indicating a positive role of *TWIST1* in transdifferentiation of WJ-MSC into rEC. (B-C) qPCR analysis of endothelial-specific markers depicting *TWIST1* reprogramming in iEC-D14 (*TWIST1 rEC*) resulted in increased mRNA expression of endothelial markers as compared with vector control group suggesting putative role of TWIST1 towards endothelial lineage transdifferentiation of WJ-MSC. *p≤0.05, as compared with *pLVX-AcGFP iEC-D14.*

*
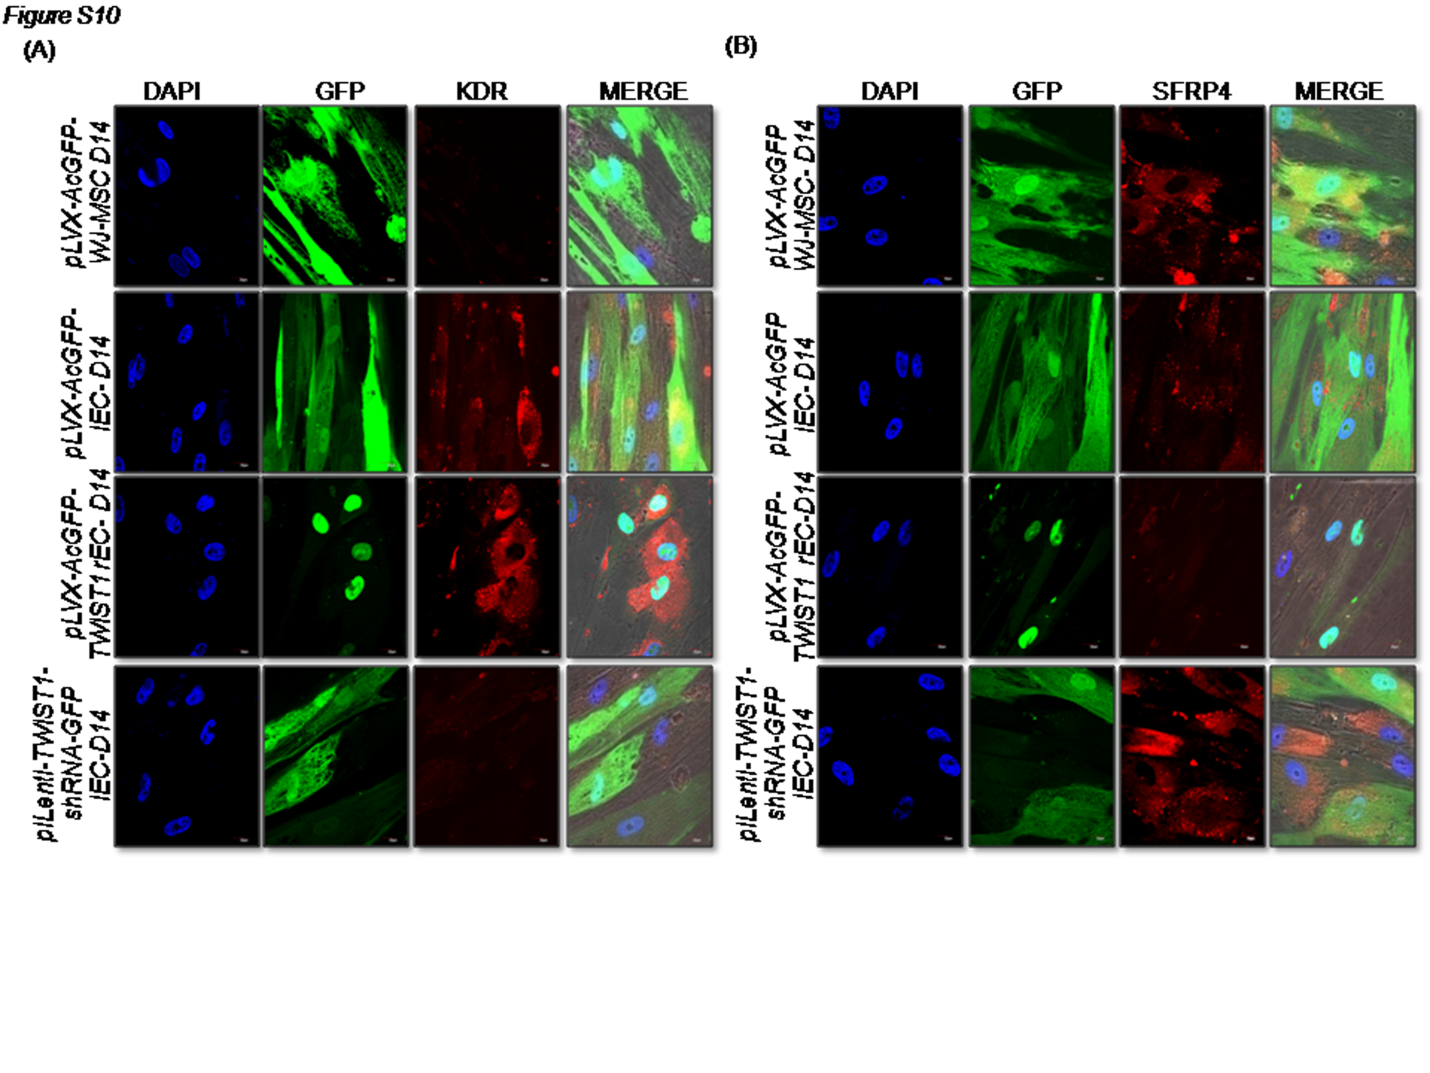
*

*Figure S10. TWIST1 overexpression regulates vasculogenic genes, KDR and SFRP4 in iECs*. Representative confocal images depicting a higher and lower co-immunostaining of (A) KDR with GFP and (B) SFRP4 with GFP, respectively in Twist1 rEC on day 14 which was reverted with *TWIST1* silencing (negative control).


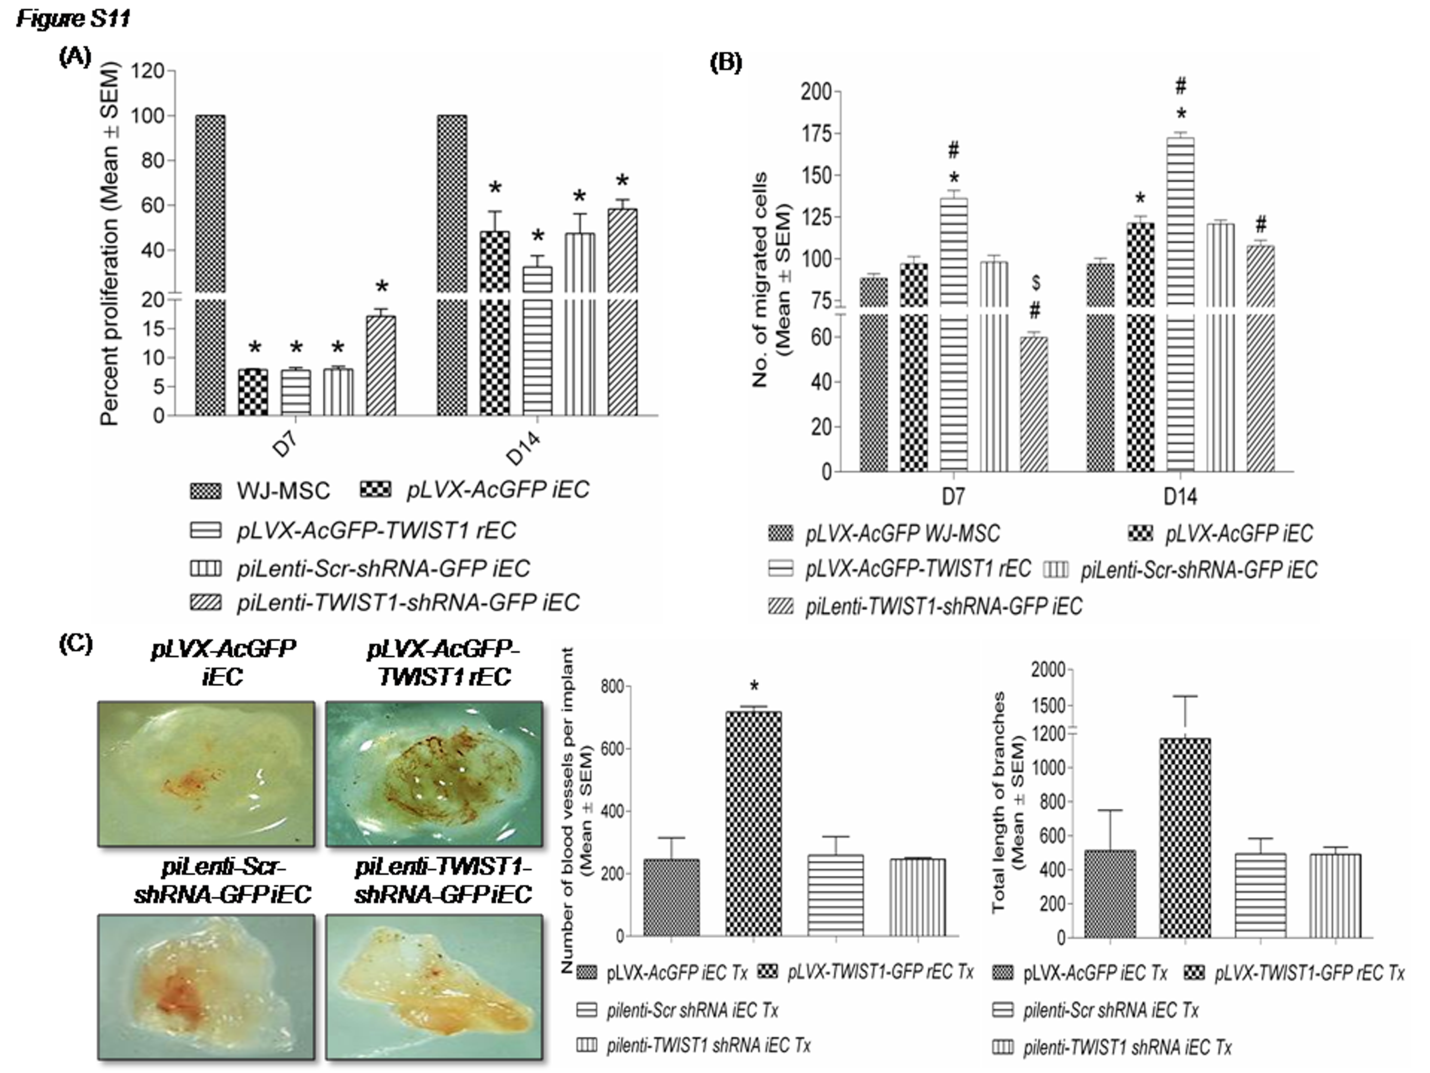


*Figure S11.Twist1 overexpression regulates vasculogenesis-related physiological functions in iECs*. (A) The proliferation capacity of *Twist1* rEC at day 7 and day 14 was significantly decreased as compared with WJ-MSCs. (B) Boyden chamber assay depicting a significant increase in chemotactic migration in *TWIST1* rEC at day 7 and day 14 that was perturbed in the presence of *TWIST1* silencing as compared with WJ-MSC. (C) CAM assay, representative images (left panel) and graphs (right panel) depicting an enhanced number of blood vessels and total length of branches in *TWIST1* rEC at day 14 as compared with WJ-MSC. p≤0.05, as compared to *WJ-MSC, #iEC, and $Scr-shRNA.


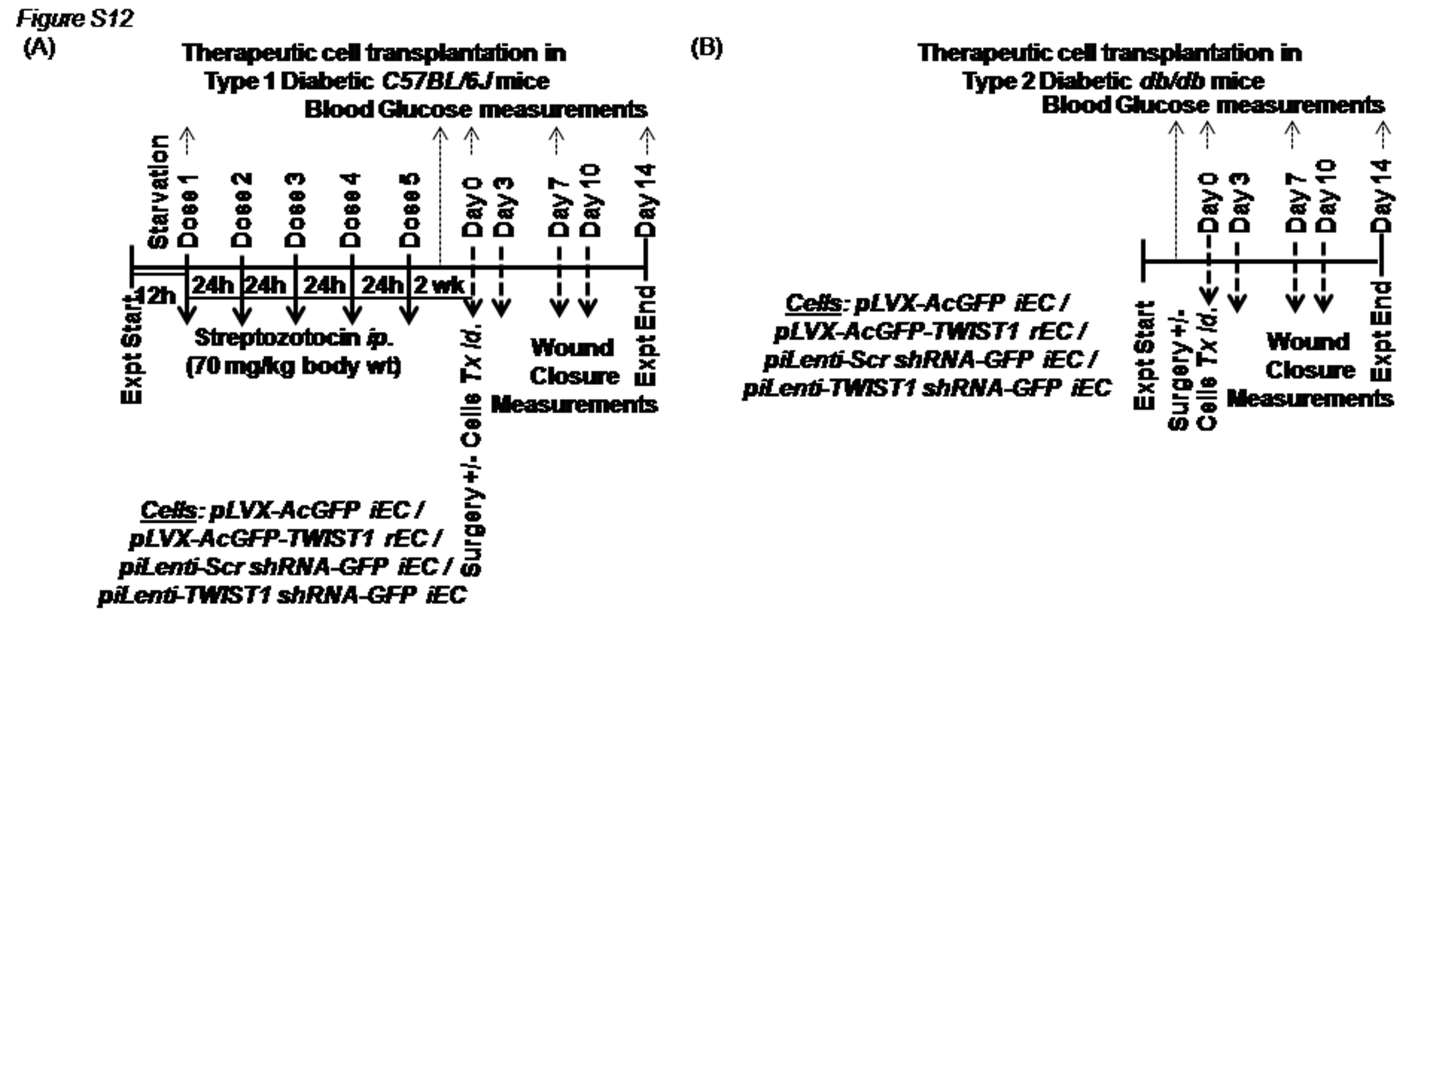


Figure S12. *Generation of full-excisional splinted wound healing model in Type 1 and Type 2 diabetic mice*. Schematic representation of (A) murine streptozotocin-induced Type 1 diabetic and (B) Type 2 diabetic full excisional splint wound healing model generation.

Figure S13. *Enhanced engraftment of TWIST1 rEC in regenerated type 1 diabetic wounds.* (A) Representative confocal images and (B) quantitation of co-localization depicting increased engraftment and co-localization of *TWIST1* rEC with GFP; (C) qPCR analysis revealing enhanced human-specific endothelial marker gene expression in regenerated skin tissue of diabetic mice suggesting direct incorporation of transplanted *TWIST1* rEC. (D) Significant increase in mouse gene-specific endothelial markers suggesting enhanced neovascularization in regenerated wounds as compared with control and/or *TWIST1* –knockdown iEC transplanted groups also occurring in a paracrine manner by the transplanted human *TWIST1* rECs.#/*p≤0.05 as compared to the *pLVX-AcGFP*-iEC Tx group.


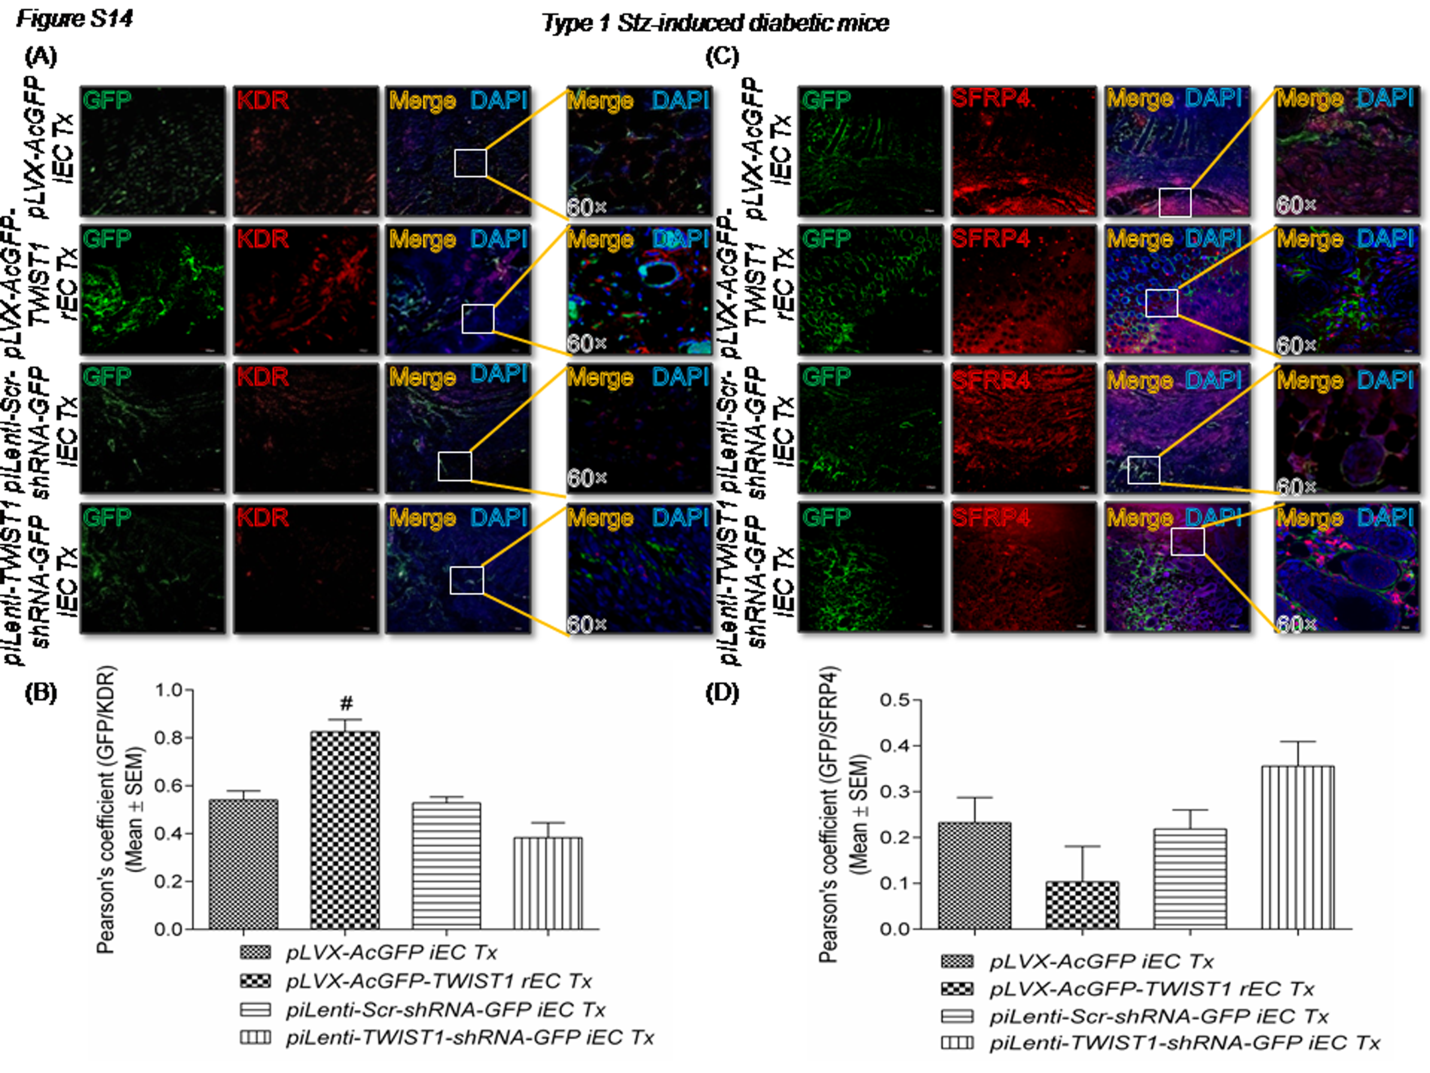


Figure S14. *TWIST1–mediated differential transcriptional regulation of KDR and SFRP4 expression in regenerated wound tissue of type 1 diabetic mice.* Representative confocal immunofluorescence images and their quantification depicting higher co-localization of GFP and (A & B) KDR expressing cells whereas decreased co-localization of (C & D) GFP and SFRP4 at wound site in *TWIST1* rEC transplanted group as compared with other iECs transplanted mice groups suggesting higher neovascularization and fate of transplanted cells at the regenerated wounds. #p≤0.05 as compared to the *pLVX-AcGFP*-iEC Tx group.


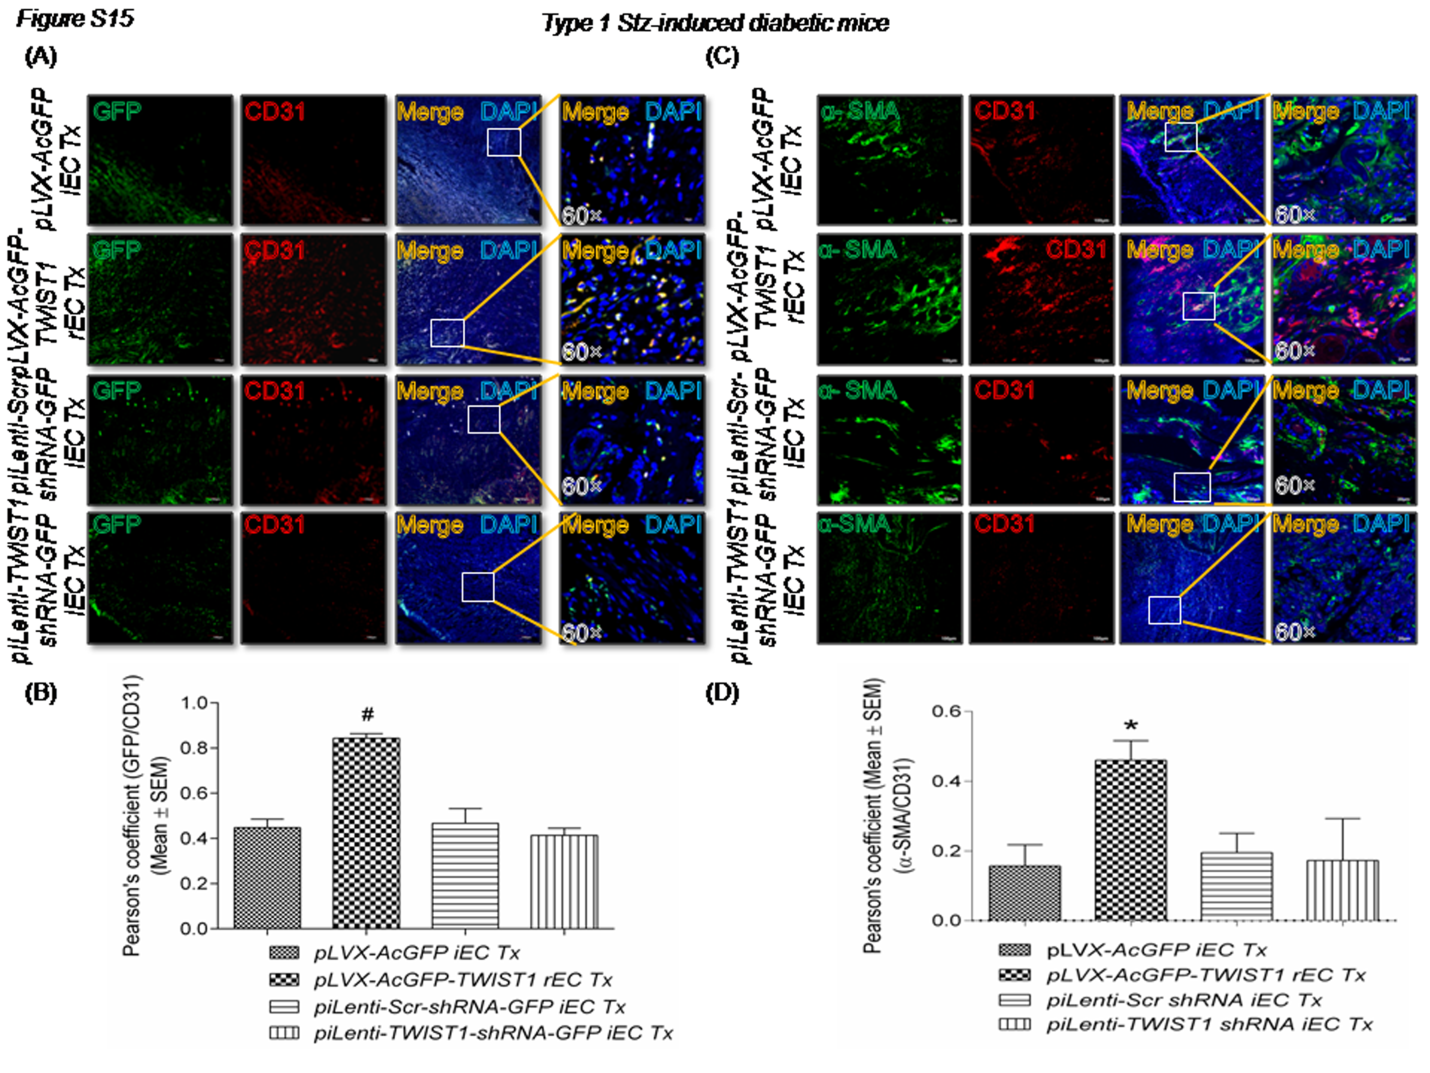


*Figure S15. Increased neovascularization by transplantation of the TWIST1 rEC transplanted group at the wound bed of type 1 diabetic wounds*. Higher co-localization of GFP and human-specific CD31 (A) type 1 diabetic mice and (B) quantification of co-localization. Also, co-immunostaining of (C) CD31 along with α-SMA and (D) quantification of co-localization in type 1 diabetic mice, confirmed the fate of the transplanted *TWIST1* rEC towards increased neovascularization at the wound site of the non-healing diabetic wounds. #/*p≤0.05 as compared to the *pLVX-AcGFP*-iEC Tx group.
